# Supplementary material for: Reduction behavior of PdO–NiO/SiO2: how Pd location affects cinnamaldehyde hydrogenation
Source: Royal Society of Chemistry journal article supplement (doi:10.1039/d4cy01190b), 2024-12-17
Supplement: d4cy01190b1.pdf [file d4cy01190b1.pdf]

## Supporting information

to

# Reduction behavior of PdO-NiO/SiO<sub>2</sub>: how the location affects cinnamaldehyde hydrogenation

Rim C.J. van de Poll, Heiner Friedrich, Emiel J.M. Hensen

This document contains the following sections:

Extended methods S1 & S2

Figures S1 – S14

Table S1

## **S1 Extended XPS fitting method.**

### **Pd 3d fitting**

The PdO is fitted with two peaks separated by a set distance of 5.26 eV corresponding to the peak orbital splitting of Pd. The area ratio between the first and second peak is set to 3:2 with a peak shape of GL(30). The metallic peaks have the same peak orbital splitting and area ratio. For the metallic peak a asymmetric peak shape of type LA(1.33,2.44,69) is used. The FWHM of all 4 peaks is set to be equal.

### **Ni 2p fitting**

The Ni 2p fit is based on two spectra. The NiO(3)-SiO<sub>2</sub> spectra after drying at 110 °C and after reduction at 800 °C (Figure S5). Both these spectra are fitted with the minimal number of peaks after which no discernible peaks are left in the residual error. Then the area ratio's, peak positions and FWHM ratio's are fixed for all peaks yielding a model for metallic Ni and Ni<sup>2+</sup>. These two models are used to fit all spectra. Comparing the Ni spectra taken at 800 °C with a bulk reference of Ar sputtered Ni metal foil (Figure S6) and a references in the literature [1], a difference in the satellite at 858.5 eV is seen. For the reduced nanoparticles in NiO(3)-SiO<sub>2</sub> this satellite does not reach a maximum and the peaks are not as sharp as the references. This is most likely caused by the difference between bulk references and nanoparticles present here, changing the ratio of satellite peaks.

## **S2 Extended method processing of CO-IR data.**

Each sample pellet is treated in the in-situ cell under the required atmosphere (art. air or 10 % H<sub>2</sub>). Then the sample is put under vacuum and cooled down using liquid nitrogen to a temperature of -170 °C ( $\pm 4$  °C). An initial measurement under vacuum is taken and then CO is dosed repeatedly using a gas loop of 25  $\mu$ L and the pressure was recorded. This measurement was repeated for both an empty cell and a cell containing only silica. To process the data, the first vacuum measurement is fitted to each spectrum in the domain 2400 – 2500 cm<sup>-1</sup> (a domain which is devoid of any peaks) and this is subtracted from the data. The spectra of silica and the empty cell was processed the same way. The spectra of the empty cell are first subtracted (to remove the signal of gas phase CO). This is done by subtracting for each data spectra, the corresponding empty cell spectra. A small correction is made for using the actual pressure which was recorded during the measurements. For both spectra the same amount of CO was dosed using the gas dosing loop. For the subtraction of silica, first the gas phase signal is removed from the blank silica spectra. Then analogue to the empty cell, for each data spectra the corresponding empty silica spectra is subtracted.

## S1. EDX measurements

HAADF-STEM images were acquired of Pd@NiO(3)-SiO<sub>2</sub> and NiO(3)SiO<sub>2</sub> as shown in figure 2 in the main article. However, due to the very small size of the nanoparticles it could not be seen whether a Pd on NiO nanoparticle system was created. Therefore STEM-EDX measurements were attempted. The measurements were carried out on a probe corrected JEOL ARM 200F TEM operated at 200 kV equipped with a 100 mm<sup>2</sup> centurio SSD EDX detector. It was noticed that during EDX mapping the nanoparticles would start to move after 2-3 seconds of exposure therefore, long EDX acquisition times could not be used. Figure S1 shows a HAADF-STEM image taken before (a) and after (b) EDX acquisition and the EDX mapping itself (c-f). The before and after images show that the particles and support move due to the influence of the electron beam, therefore, the EDX mapping becomes unreliable. Additionally, the EDX mapping shows that the current mapping (10 s acquisition time, 128x128 pixels) was not enough to get sufficient Pd signal. Further dose optimization was done, however, no reliable EDX data could be obtained at the required doses for EDX analysis at high resolution.

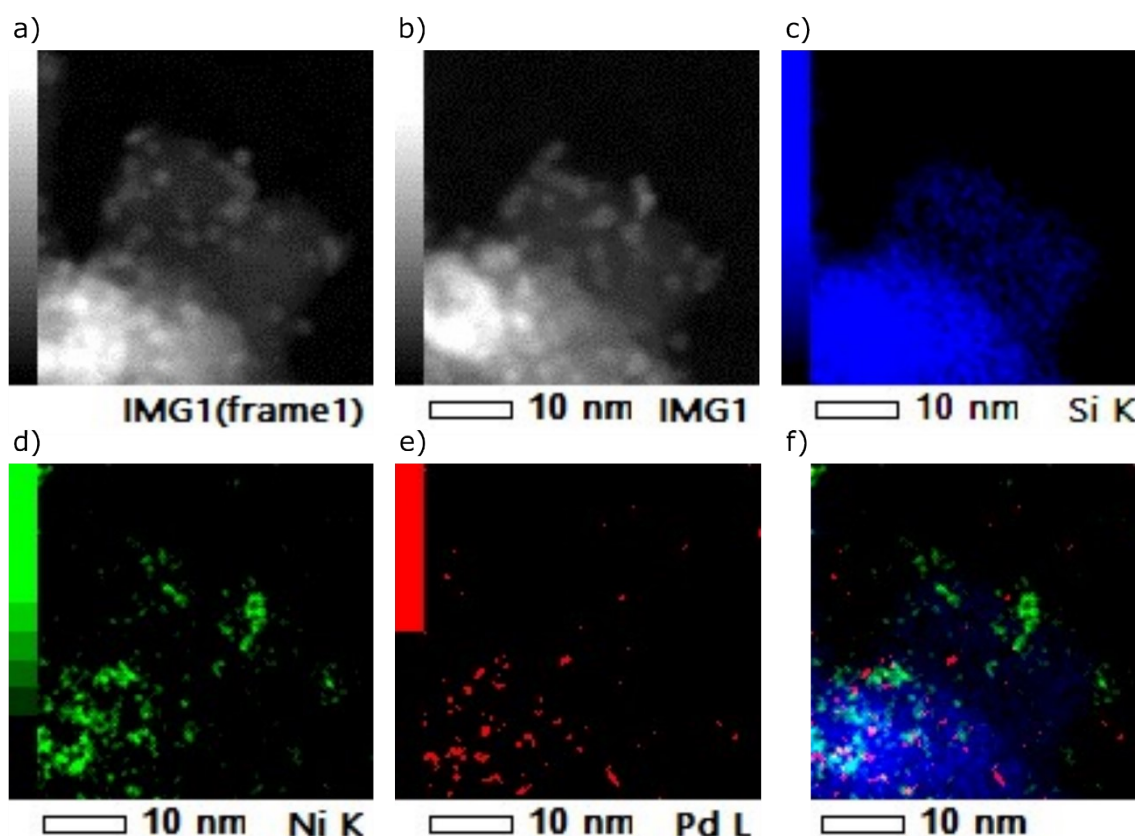

Figure S1. HAADF-STEM and EDX mapping of Pd@NiO(3)-SiO<sub>2</sub>.

## S2. Particle size distributions

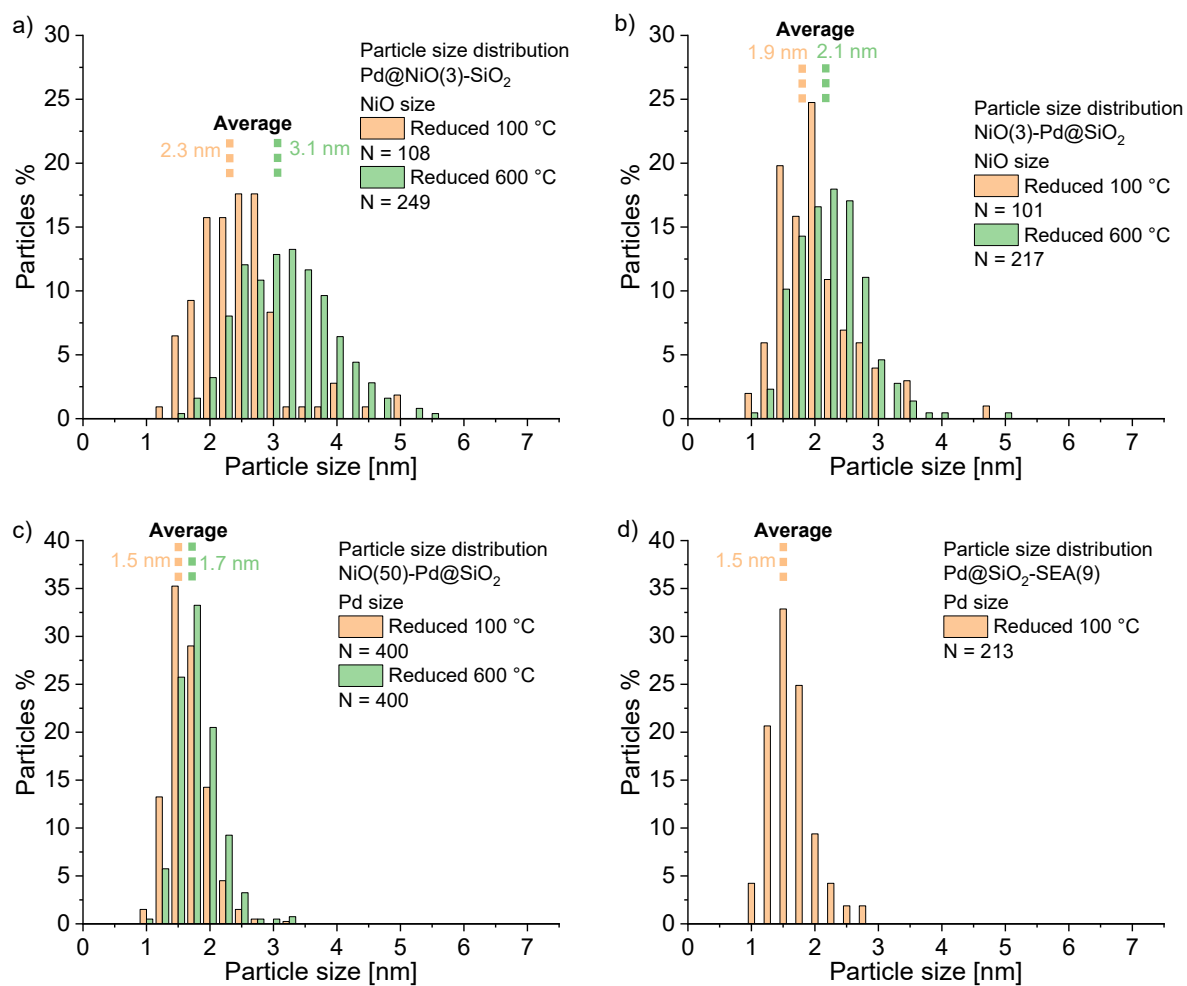

Figure S2 (a-d). Number average particle size distributions derived from HAADF-STEM images using manual annotation in ImageJ.

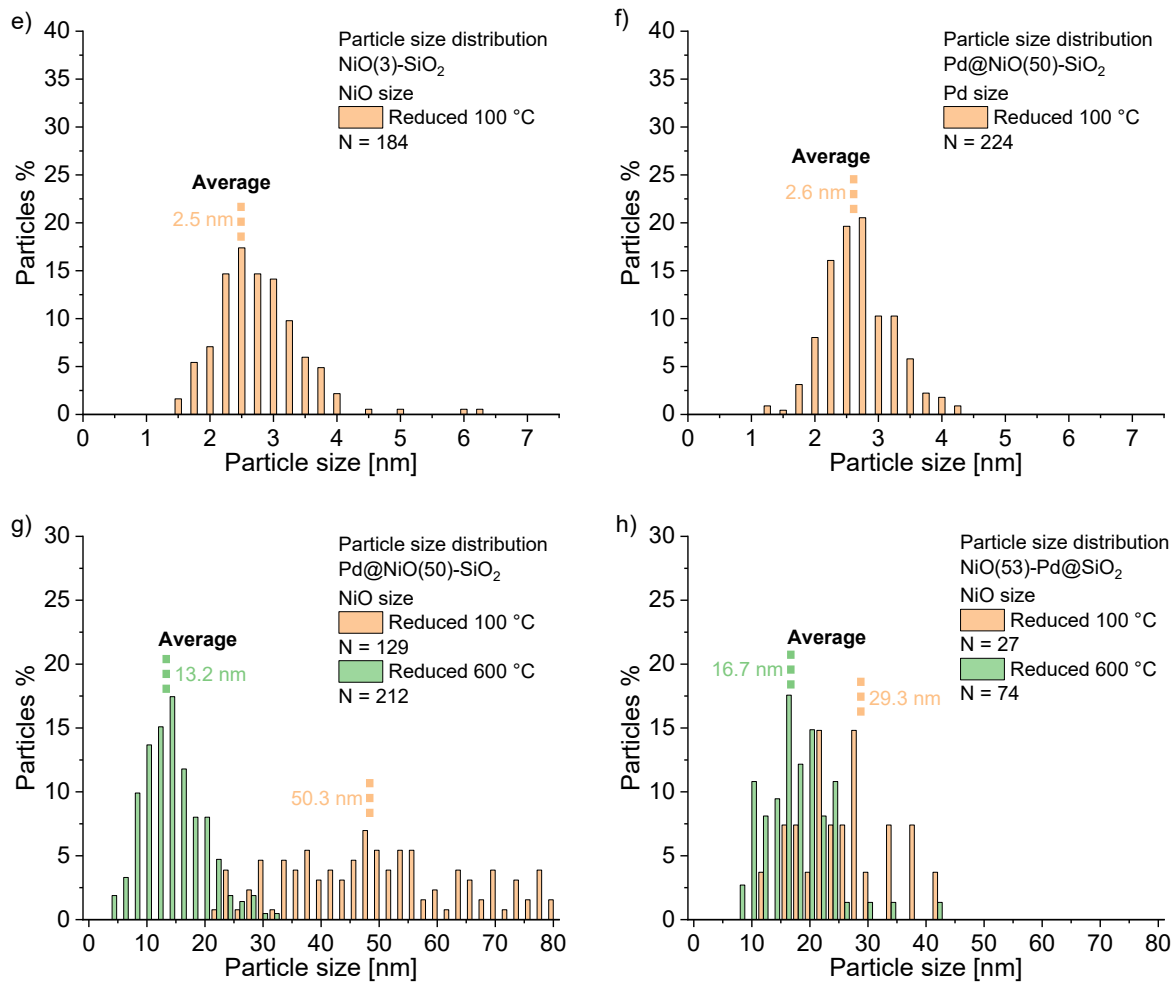

Figure S2 (e-h). Number average particle size distributions derived from HAADF-STEM images using manual annotation in ImageJ.

### S3. Cinnamaldehyde hydrogenation selectivities

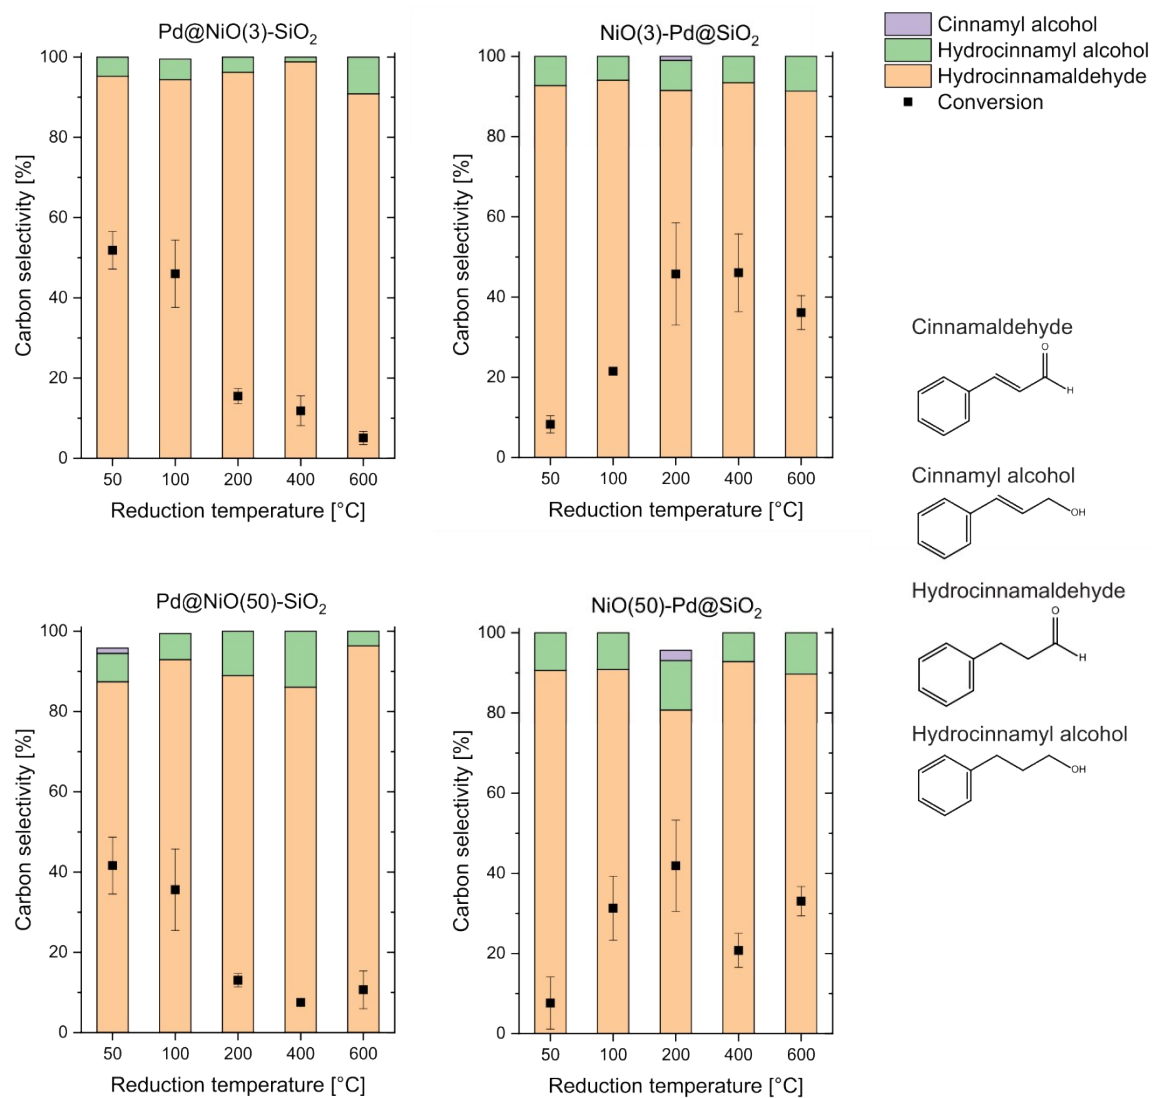

Figure S3. Cinnamaldehyde hydrogenation activity of Pd-NiO-SiO<sub>2</sub> catalysts (batch reactor, 50 °C, 4 mg catalyst, 2.8 ml IPA solvent, 1.2 ml cinnamaldehyde, 30 bar H<sub>2</sub>, 10 h reaction time)

#### S4. Cinnamaldehyde activity of NiO(3)-SiO<sub>2</sub> and Pd@SiO<sub>2</sub> SEA 9

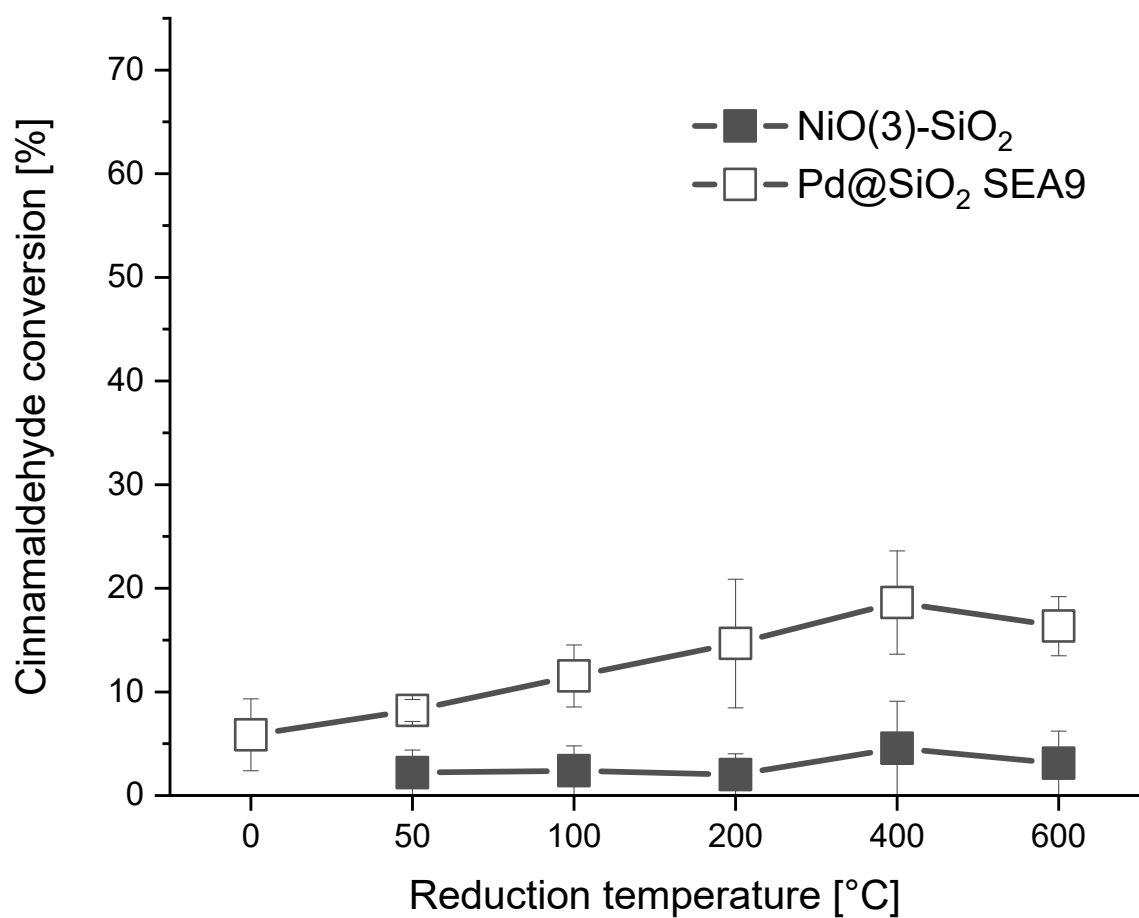

Figure S4. Cinnamaldehyde hydrogenation activity of NiO(3)-SiO<sub>2</sub> and Pd@SiO<sub>2</sub>-SEA(9) (batch reactor, 50 °C, 4 mg catalyst, 2.8 ml IPA solvent, 1.2 ml cinnamaldehyde, 30 bar H<sub>2</sub>, 10 h reaction time).



### S5. Quasi in-situ XPS spectra of NiO(3)-SiO<sub>2</sub> after different reduction treatments.

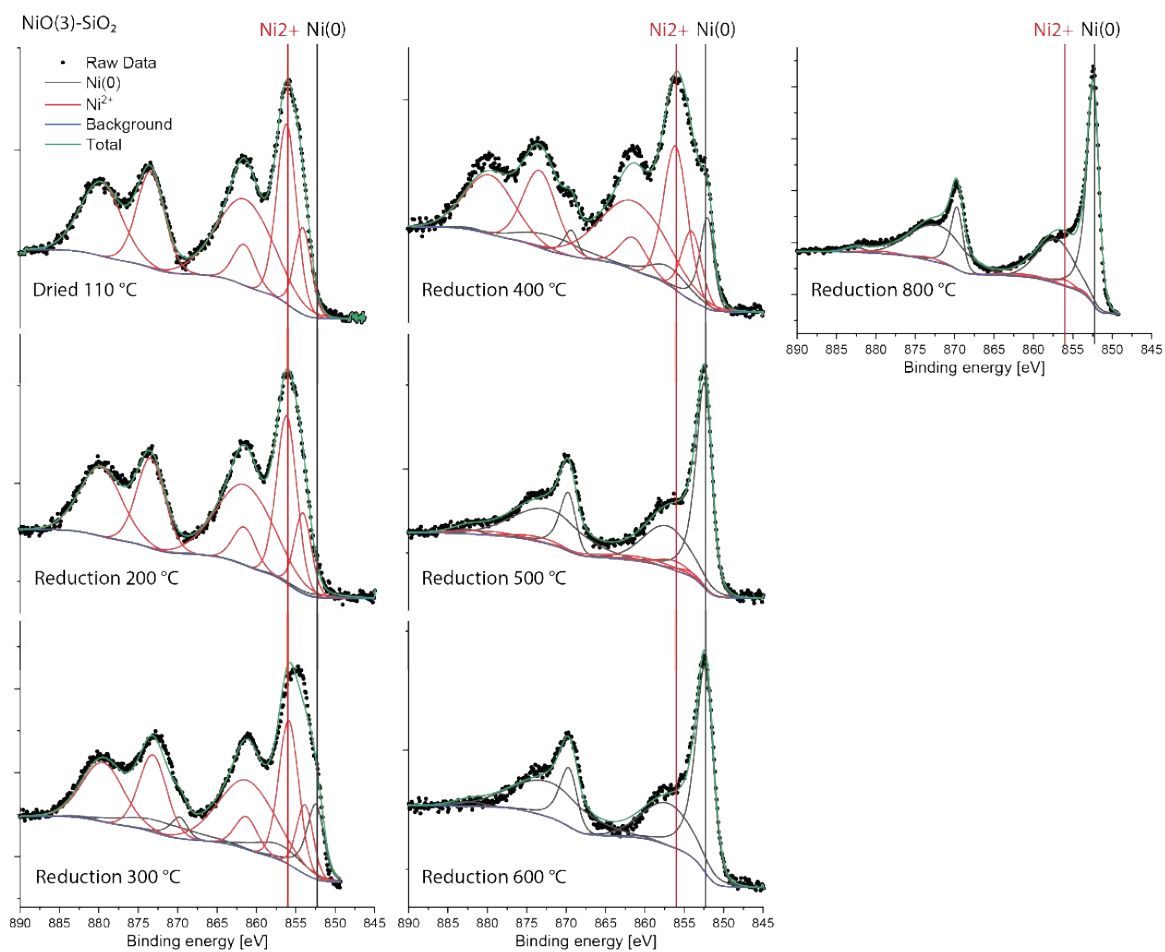

Figure S5. Quasi in-situ Ni 2p XPS spectra of NiO(3)-SiO<sub>2</sub>.

### S6. Ni 2p bulk reference spectra

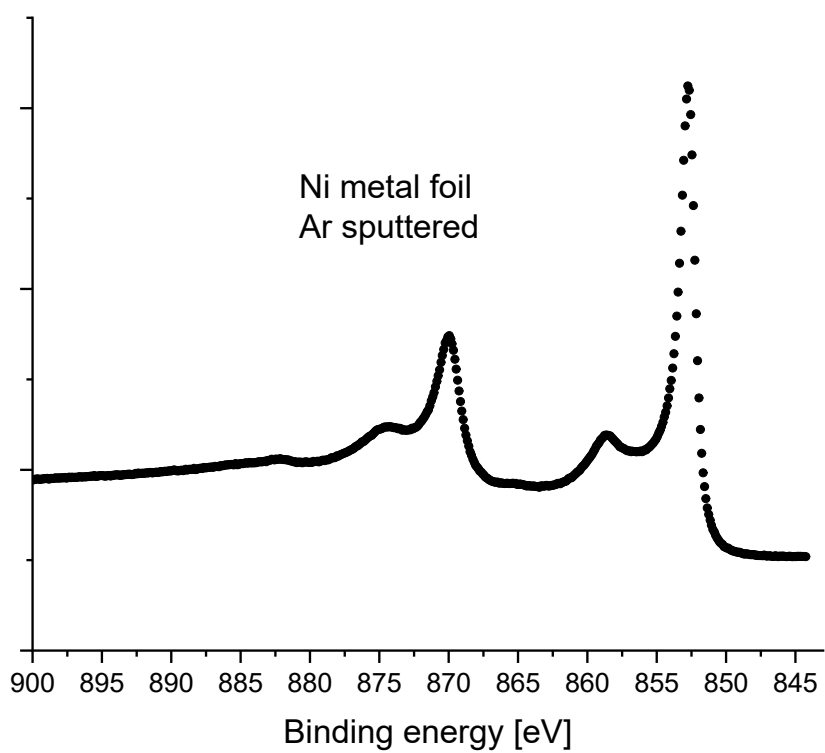

*Figure S6. Ni 2p reference spectra of a Ni metal foil which was Ar sputtered to remove oxide layers.*

## S7. Quasi in-situ XPS of NiO(3)-Pd@SiO<sub>2</sub>

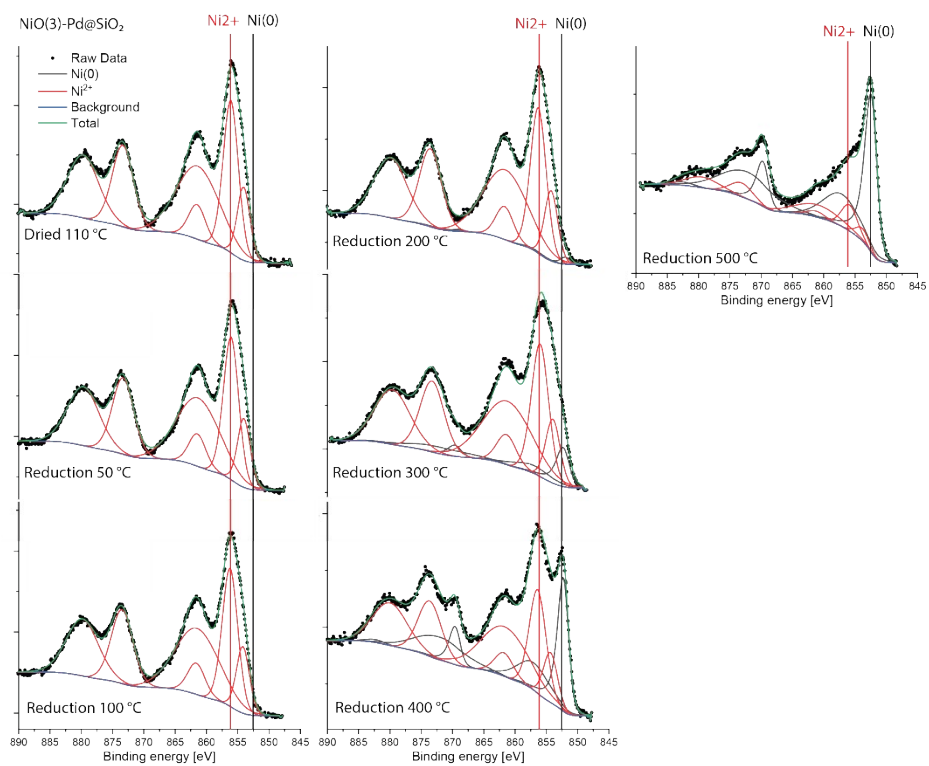

Figure S7. Quasi in-situ Ni 2p XPS spectra of NiO(3)-Pd@SiO<sub>2</sub>.

### S8. TPR with non-continuous heating rate

Temperature programmed reduction (TPR) is carried out with temperature dwells instead of a continuous heating rate. Several peaks are observed at the different temperature dwells. These peaks are integrated and are used as the degree of reduction shown in Figure 9 in the main text. For the XPS data the percentages of Ni(0) in the Ni 2p fits of Pd@NiO(3)-SiO<sub>2</sub> (Fig. S10) and NiO(3)-Pd@SiO<sub>2</sub> (Fig. S8) are used. These values are plotted in Figure 8, where we can see that the TPR signals are quite similar, except slightly more reduction for NiO(3)-Pd@SiO<sub>2</sub> at low temperature, and more reduction for Pd@NiO(3)-SiO<sub>2</sub> at high temperature. Overall, we can see that there is a decent agreement between XPS and TPR, but that XPS lags the TPR data somewhat.

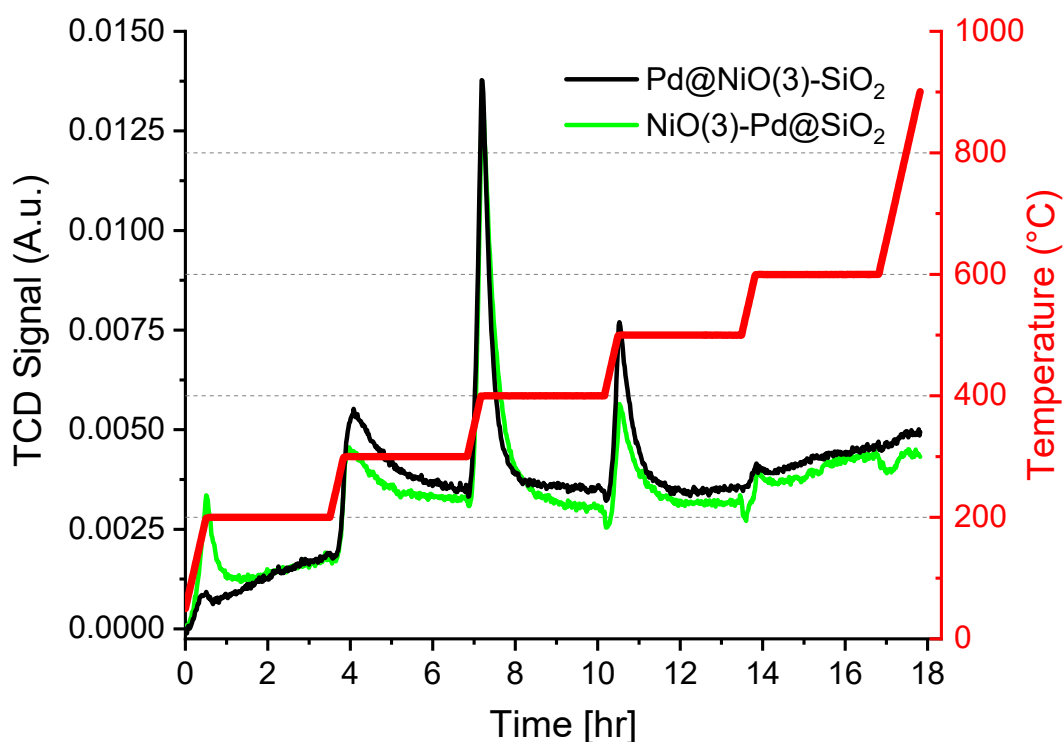

Figure S8. TPR of Pd@NiO(3)-SiO<sub>2</sub> and NiO(3)-Pd@SiO<sub>2</sub> measured with a non-linear temperature profile.

## S9. Quasi in-situ XPS of Pd@NiO(3)-SiO<sub>2</sub>

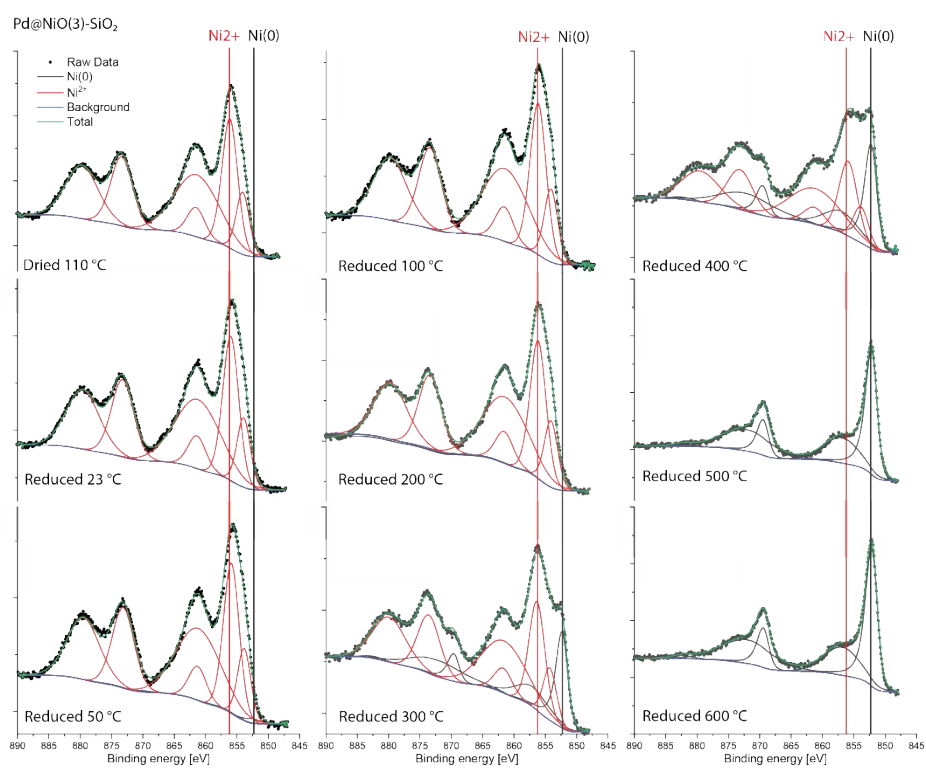

Figure S9. Quasi in-situ Ni 2p XPS spectra of Pd@NiO(3)-SiO<sub>2</sub>.

### S10. Reduction of PdO to Pd under RT CO atmosphere

A Pd@NiO(3)-SiO<sub>2</sub> sample was dried overnight and CO was dosed at RT. This showed peaks at 1991 and 1931 cm<sup>-1</sup> which are indicative of linear and bridged bound CO on metallic Pd (Figure S10). The measurement was repeated on a fresh sample with the same pretreatment, but CO dosing was done under liquid nitrogen cooling (Figure S11). Here no signal of metallic Pd could be observed, showing that the CO at room temperature can reduce PdO and caused the formation of metallic Pd. This behavior was also observed in the literature [2].

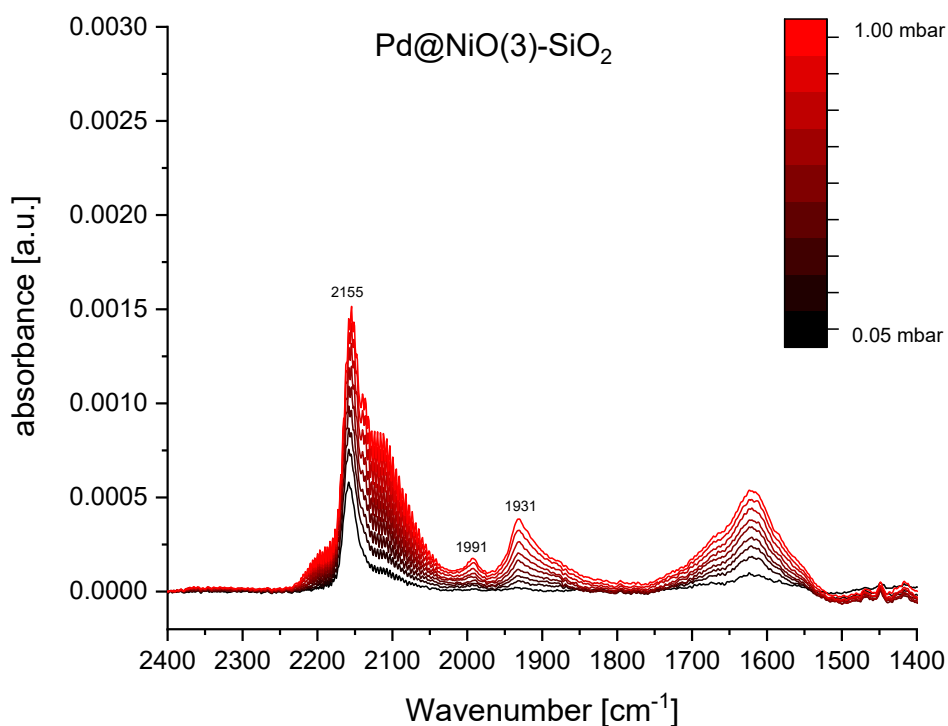

Figure S10. CO IR spectra of Pd@NiO(3)-SiO<sub>2</sub> dried at 110 °C measured at RT.

### S11. CO-IR spectra of dried Pd@NiO(3)-SiO<sub>2</sub> without silica signal removal

The same sample and pretreatment as in Fig. S10. However, CO dosing was done under cooling at  $\sim -170$  °C. At these temperatures CO cannot reduce PdO and no CO bound to Pd can be seen. The spectra of blank silica (Fig. S12.) is subtracted from these spectra as described in the extended method S2.

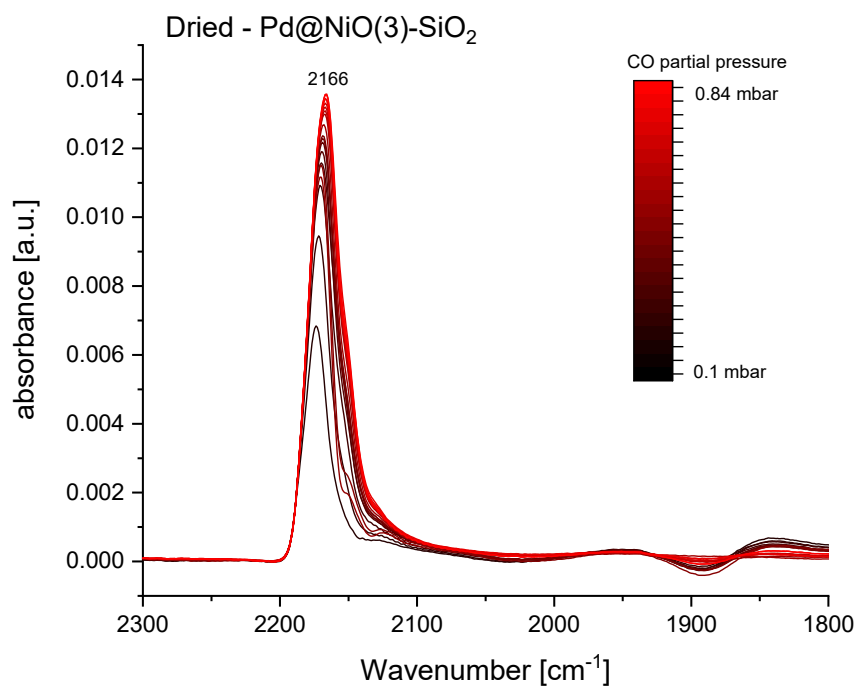

Figure S11. CO IR spectra of Pd@NiO(3)-SiO<sub>2</sub> acquired at  $\sim -170$  °C.

## S12. CO-IR spectra of SiO<sub>2</sub> measured at ~170 °C

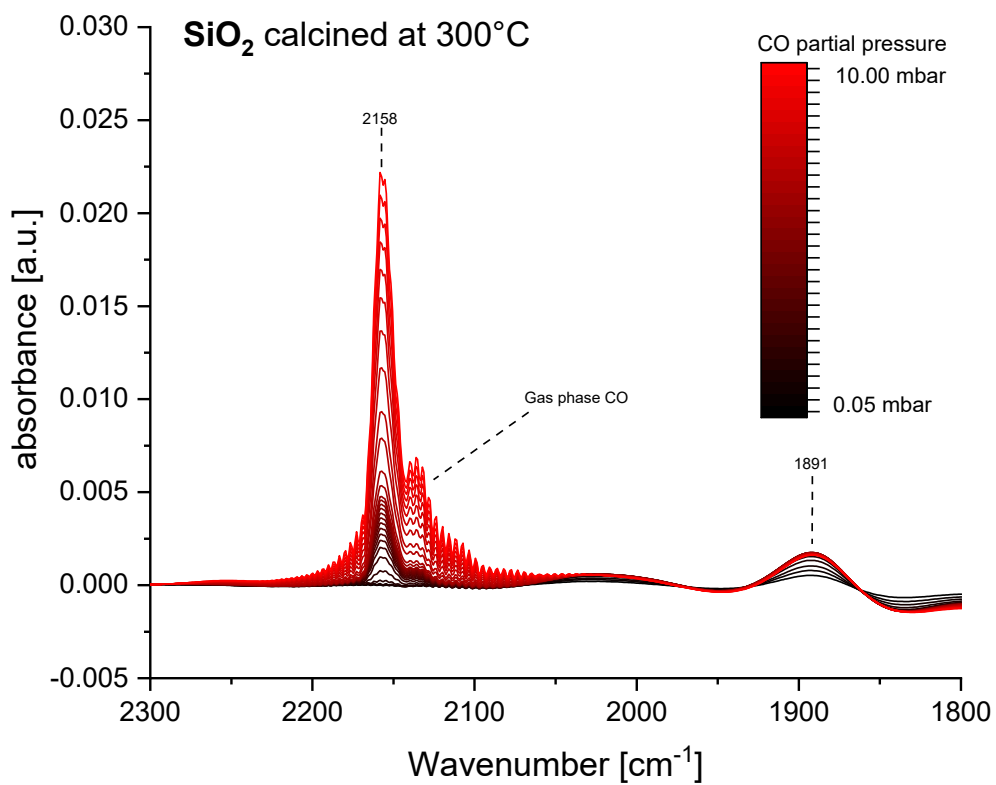

Figure S12. CO IR spectra of calcined silica measured at ~170 °C.



### S13. CO FTIR after different pretreatments with a CO pressure of 0.24 mbar.

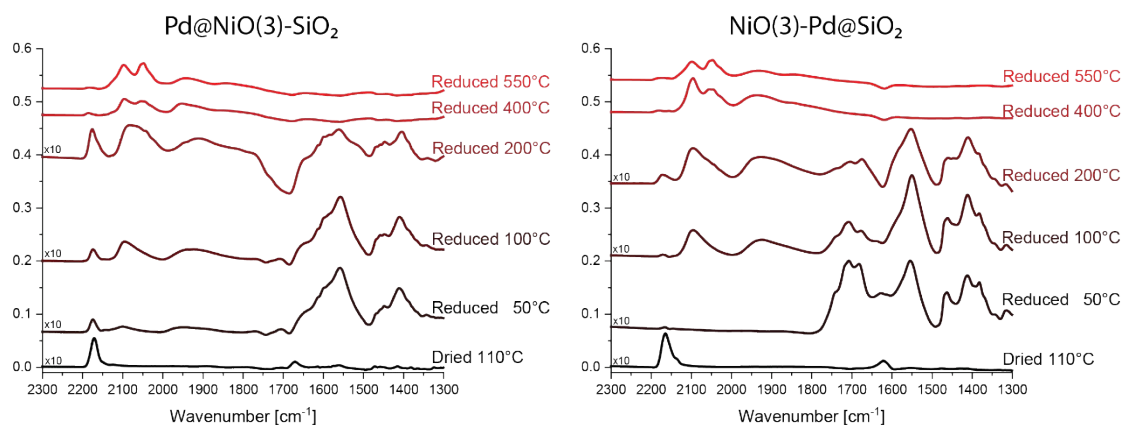

Figure S13. Larger domain of the CO IR spectra of Pd@NiO(3)-SiO<sub>2</sub> and NiO(3)-Pd@SiO<sub>2</sub> at 0.24 mbar CO partial pressure.

### S14. CO-IR reference spectra of metallic Ni reduced at 400 °C. Silica and gas phase spectra are not subtracted in this figure.

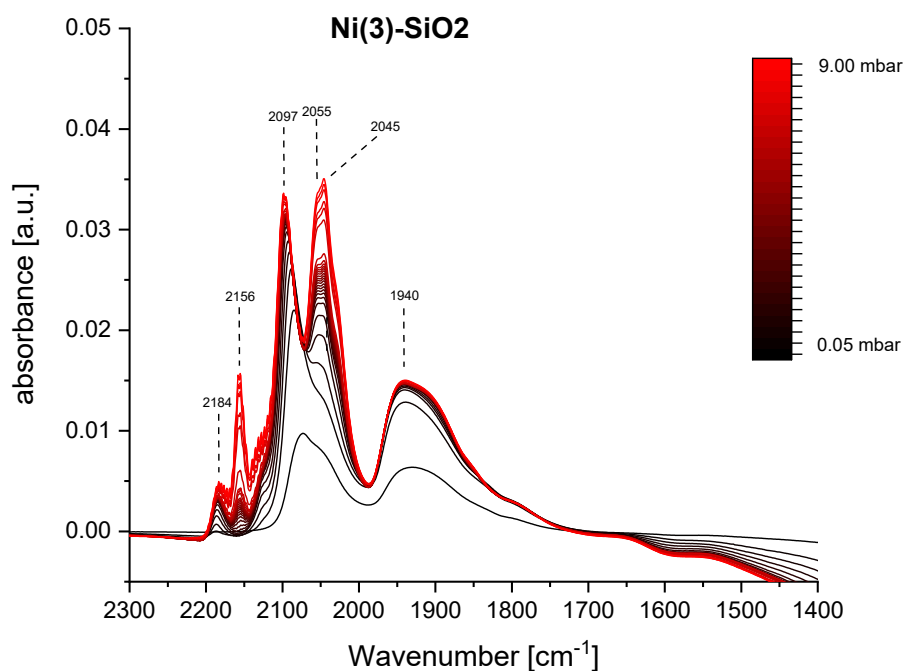

Figure S14. CO IR spectra of Ni(3)-SiO<sub>2</sub> reduced at 400 °C measured at ~-170 °C.

**Table S1.** H<sub>2</sub> chemisorption of Pd-NiO catalysts after different reduction treatments. \* For the first data point the catalyst was dried in He. For the other points the catalyst was reduced at the indicated temperature in H<sub>2</sub>. H:X ratios were based on the weight loadings of Pd and Ni as determined by ICP. In the case of bimetallic catalysts, both the H:Pd and H:Ni ratio was calculated. The H:Pd ratio at low reduction temperature is especially useful, as no NiO is reduced yet and we can assume that all hydrogen is adsorbed on Pd.

| Sample name                      | Reduction temperature [°C] | 1 <sup>st</sup> H <sub>2</sub> Adsorption [mmol/gr <sub>cat</sub> ] | 2 <sup>nd</sup> H <sub>2</sub> Adsorption [mmol/gr <sub>cat</sub> ] | H:metal ratio, 1 <sup>st</sup> adsorption | H:metal ratio, 2 <sup>nd</sup> adsorption | H:Pd ratio, 1 <sup>st</sup> adsorption | H:Pd ratio, 2 <sup>nd</sup> adsorption | H:Ni ratio, 1 <sup>st</sup> adsorption | H:Ni ratio, 2 <sup>nd</sup> adsorption |
|----------------------------------|----------------------------|---------------------------------------------------------------------|---------------------------------------------------------------------|-------------------------------------------|-------------------------------------------|----------------------------------------|----------------------------------------|----------------------------------------|----------------------------------------|
| <b>Pd@NiO(3)-SiO<sub>2</sub></b> | Dried 110*                 | 0.085                                                               | 0.033                                                               | 0.110                                     | 0.043                                     | 3.614                                  | 1.413                                  | 0.113                                  | 0.044                                  |
|                                  | 50                         | 0.024                                                               | 0.029                                                               | 0.031                                     | 0.038                                     | 1.020                                  | 1.247                                  | 0.032                                  | 0.039                                  |
|                                  | 100                        | 0.032                                                               | 0.030                                                               | 0.041                                     | 0.039                                     | 1.360                                  | 1.285                                  | 0.043                                  | 0.040                                  |
|                                  | 200                        | 0.129                                                               | 0.092                                                               | 0.167                                     | 0.119                                     | 5.511                                  | 3.910                                  | 0.172                                  | 0.122                                  |
|                                  | 300                        | 0.236                                                               | 0.181                                                               | 0.305                                     | 0.234                                     | 10.061                                 | 7.707                                  | 0.315                                  | 0.241                                  |
|                                  | 400                        | 0.203                                                               | 0.173                                                               | 0.262                                     | 0.223                                     | 8.658                                  | 7.370                                  | 0.271                                  | 0.230                                  |
|                                  | 550                        | 0.216                                                               | 0.160                                                               | 0.278                                     | 0.207                                     | 9.180                                  | 6.817                                  | 0.287                                  | 0.213                                  |
| <b>NiO(3)-Pd@SiO<sub>2</sub></b> | Dried 110*                 | 0                                                                   | 0                                                                   | 0                                         | 0                                         | 0                                      | 0                                      | 0                                      | 0                                      |
|                                  | 50                         | 0.035                                                               | 0.031                                                               | 0.042                                     | 0.037                                     | 0.571                                  | 0.500                                  | 0.045                                  | 0.040                                  |
|                                  | 100                        | 0.073                                                               | 0.057                                                               | 0.087                                     | 0.068                                     | 1.181                                  | 0.919                                  | 0.094                                  | 0.073                                  |
|                                  | 200                        | 0.225                                                               | 0.130                                                               | 0.269                                     | 0.155                                     | 3.653                                  | 2.108                                  | 0.290                                  | 0.167                                  |
|                                  | 300                        | 0.343                                                               | 0.224                                                               | 0.409                                     | 0.267                                     | 5.567                                  | 3.636                                  | 0.442                                  | 0.289                                  |
|                                  | 400                        | 0.339                                                               | 0.234                                                               | 0.405                                     | 0.280                                     | 5.512                                  | 3.807                                  | 0.438                                  | 0.302                                  |
|                                  | 550                        | 0.268                                                               | 0.196                                                               | 0.321                                     | 0.234                                     | 4.359                                  | 3.181                                  | 0.346                                  | 0.253                                  |
| <b>Pd@SiO<sub>2</sub>-SEA(9)</b> | Dried 110*                 | 0                                                                   | 0                                                                   | 0                                         | 0                                         |                                        |                                        |                                        |                                        |
|                                  | 50                         | 0.016                                                               | 0.015                                                               | 0.676                                     | 0.646                                     |                                        |                                        |                                        |                                        |
|                                  | 100                        | 0.025                                                               | 0.024                                                               | 1.060                                     | 1.007                                     |                                        |                                        |                                        |                                        |
|                                  | 200                        | 0.021                                                               | 0.022                                                               | 0.895                                     | 0.926                                     |                                        |                                        |                                        |                                        |
|                                  | 300                        | 0.028                                                               | 0.025                                                               | 1.161                                     | 1.049                                     |                                        |                                        |                                        |                                        |
|                                  | 400                        | 0.032                                                               | 0.022                                                               | 1.347                                     | 0.905                                     |                                        |                                        |                                        |                                        |
|                                  | 550                        | 0.026                                                               | 0.020                                                               | 1.069                                     | 0.819                                     |                                        |                                        |                                        |                                        |
| <b>NiO(3)-SiO<sub>2</sub></b>    | Dried 110*                 | 0                                                                   | 0                                                                   | 0                                         | 0                                         |                                        |                                        |                                        |                                        |
|                                  | 50                         | 0                                                                   | 0                                                                   | 0                                         | 0                                         |                                        |                                        |                                        |                                        |
|                                  | 100                        | 0                                                                   | 0                                                                   | 0                                         | 0                                         |                                        |                                        |                                        |                                        |
|                                  | 200                        | 0.032                                                               | 0                                                                   | 0.042                                     | 0                                         |                                        |                                        |                                        |                                        |
|                                  | 300                        | 0.193                                                               | 0.160                                                               | 0.255                                     | 0.212                                     |                                        |                                        |                                        |                                        |
|                                  | 400                        | 0.258                                                               | 0.213                                                               | 0.341                                     | 0.282                                     |                                        |                                        |                                        |                                        |
|                                  | 550                        | 0.236                                                               | 0.195                                                               | 0.313                                     | 0.258                                     |                                        |                                        |                                        |                                        |

## References

- [1] A. P. Grosvenor, M. C. Biesinger, R. S. C. Smart, and N. S. McIntyre, “New interpretations of XPS spectra of nickel metal and oxides,” *Surf. Sci.*, vol. 600, no. 9, pp. 1771–1779, 2006.
- [2] G. Spezzati *et al.*, “Atomically dispersed Pd-O species on CeO<sub>2</sub>(111) as highly active sites for low-temperature CO oxidation,” *ACS Catal.*, vol. 7, no. 10, pp. 6887–6891, 2017.
